# Supplementary material for: Dissecting the Seed Maturation and Germination Processes in the Non-Orthodox Quercus ilex Species Based on Protein Signatures as Revealed by 2-DE Coupled to MALDI-TOF/TOF Proteomics Strategy
Source: MDPI journal article supplement (doi:10.3390/ijms21144870), 2020-07-09

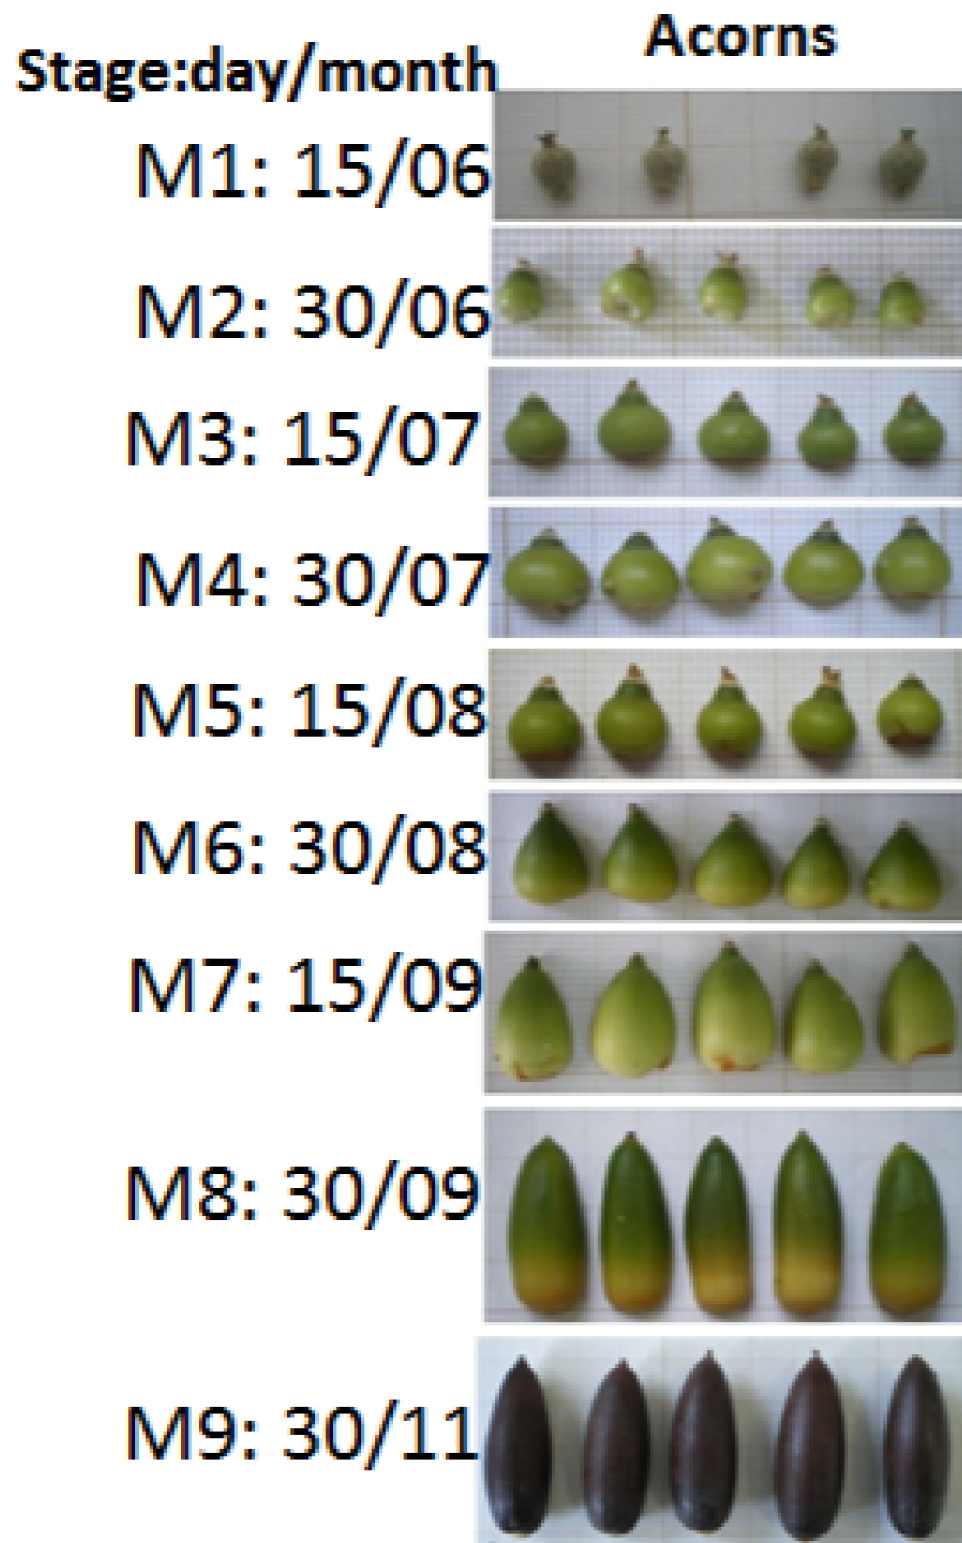

**Figure S1.** Photos of the Holm oak acorns at the different collected stages, from M1 to M9. The date of fruit collection is indicated. M9 corresponds to the mature acorns

## Developmental stages

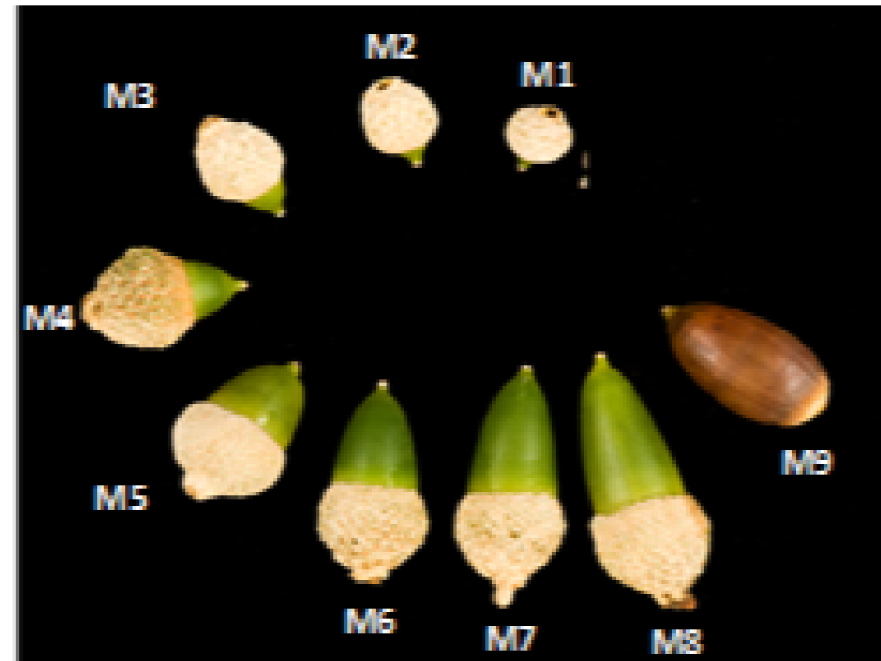

**Figure S2.** Photos of the Holm oak seeds during the different developmental stages (maturation and germination). A; maturation stages of the entire acorn from stage M1 to M9, with the median longitudinal section of the acorn showing the position of the cotyledon surrounded by the pericarp and localizing the embryonic axis (EA) inside the cotyledon (C). B; photo of non-germinating (NG) and germinating acorns of Holm oak during different stages (from G1 to G5), showing the emersion of the radicle (R). EA, embryo axis, C; cotyledon, NG; non-germinating and R; radicle

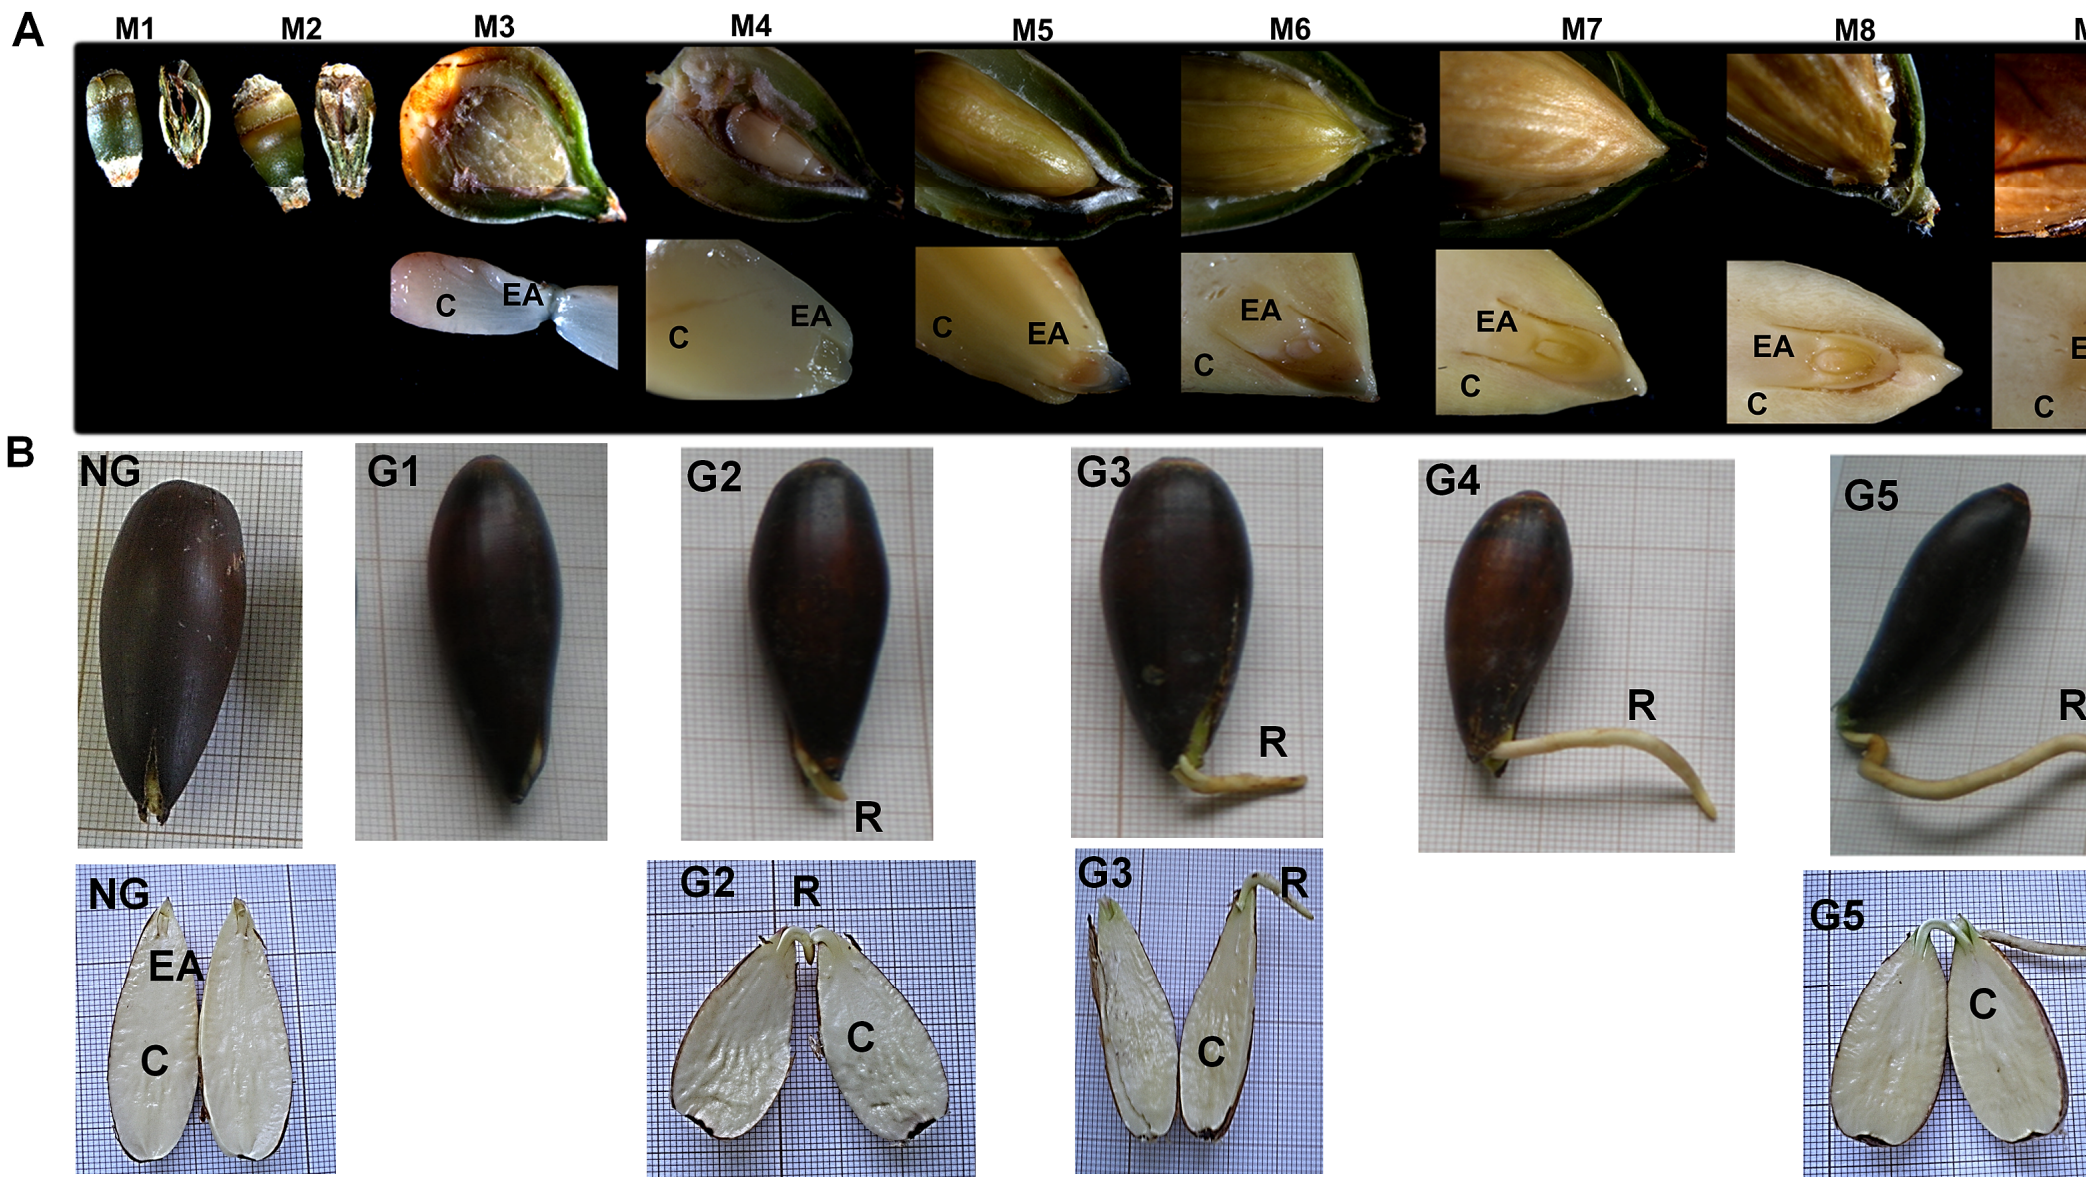

## Maturation

## Germination

Cotyledon

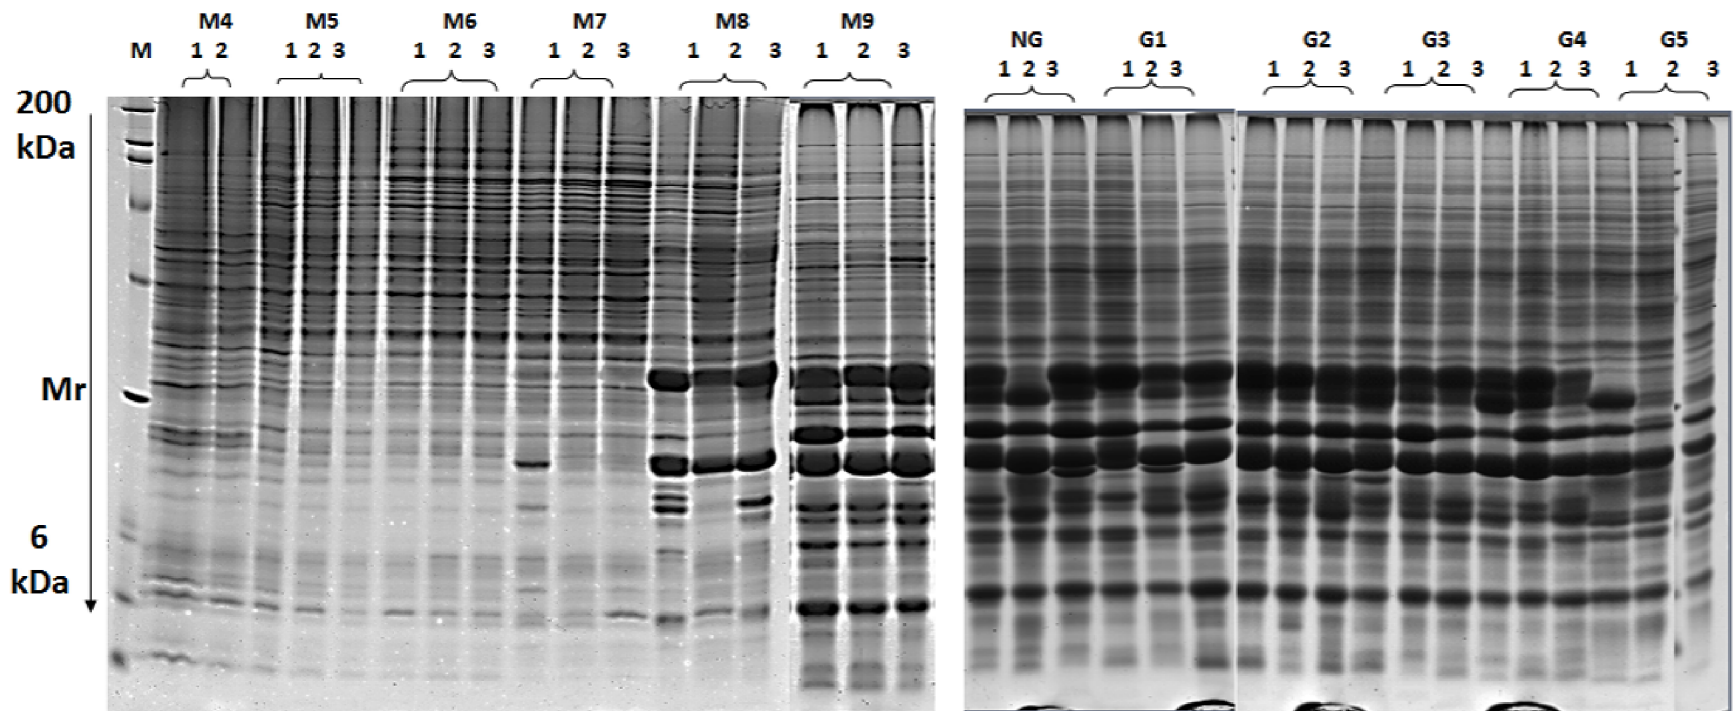

## Maturation

## Germination

Embryonic axis

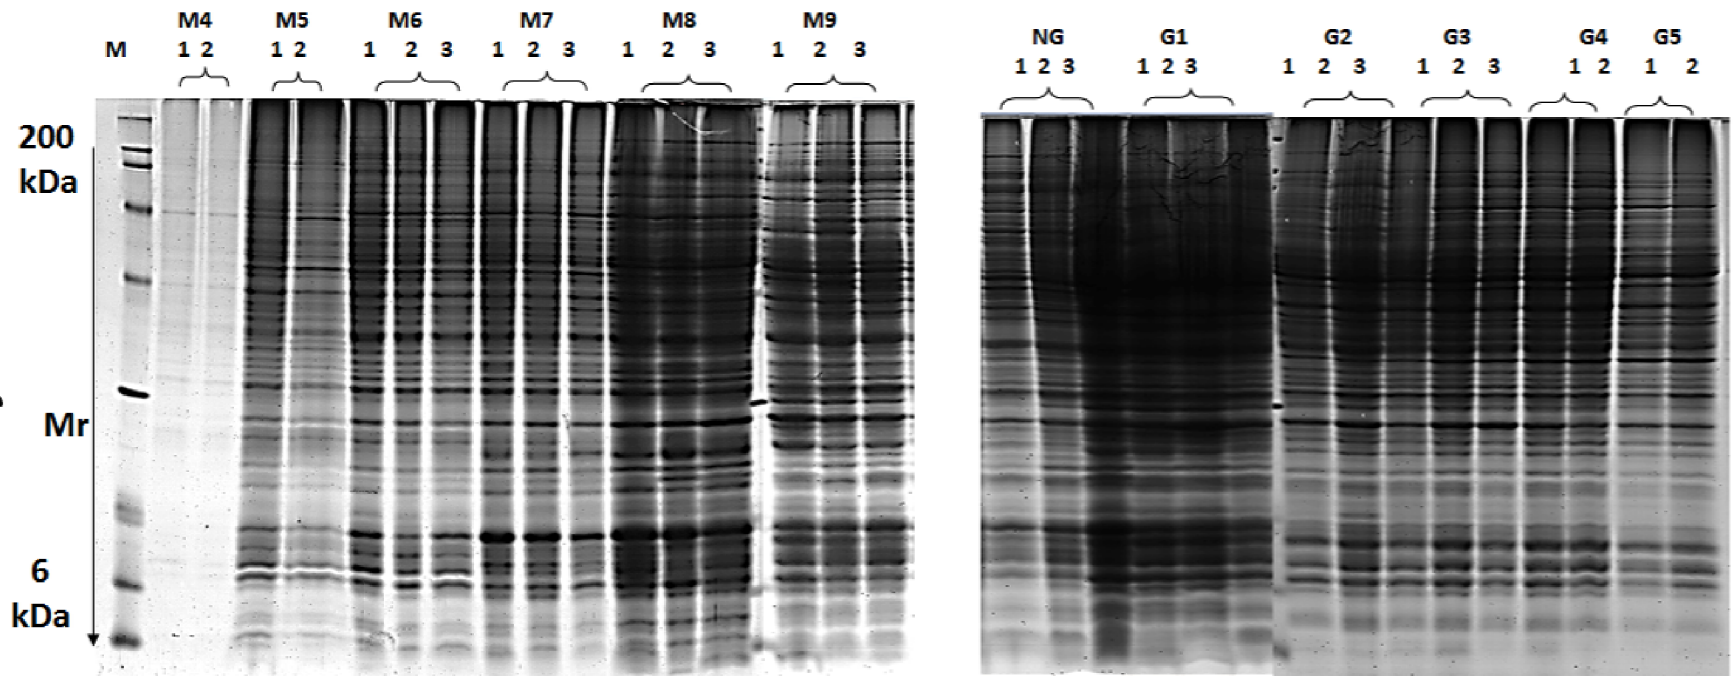

**Figure S4.** Representative 2-DE gel images of embryonic axis and cotyledon during different maturation (M6-M9) and germination (G3 and G5) stages, including non-germinating acorns (NG). Molecular marker (*Mr*) was given on the left and *pI* on top.

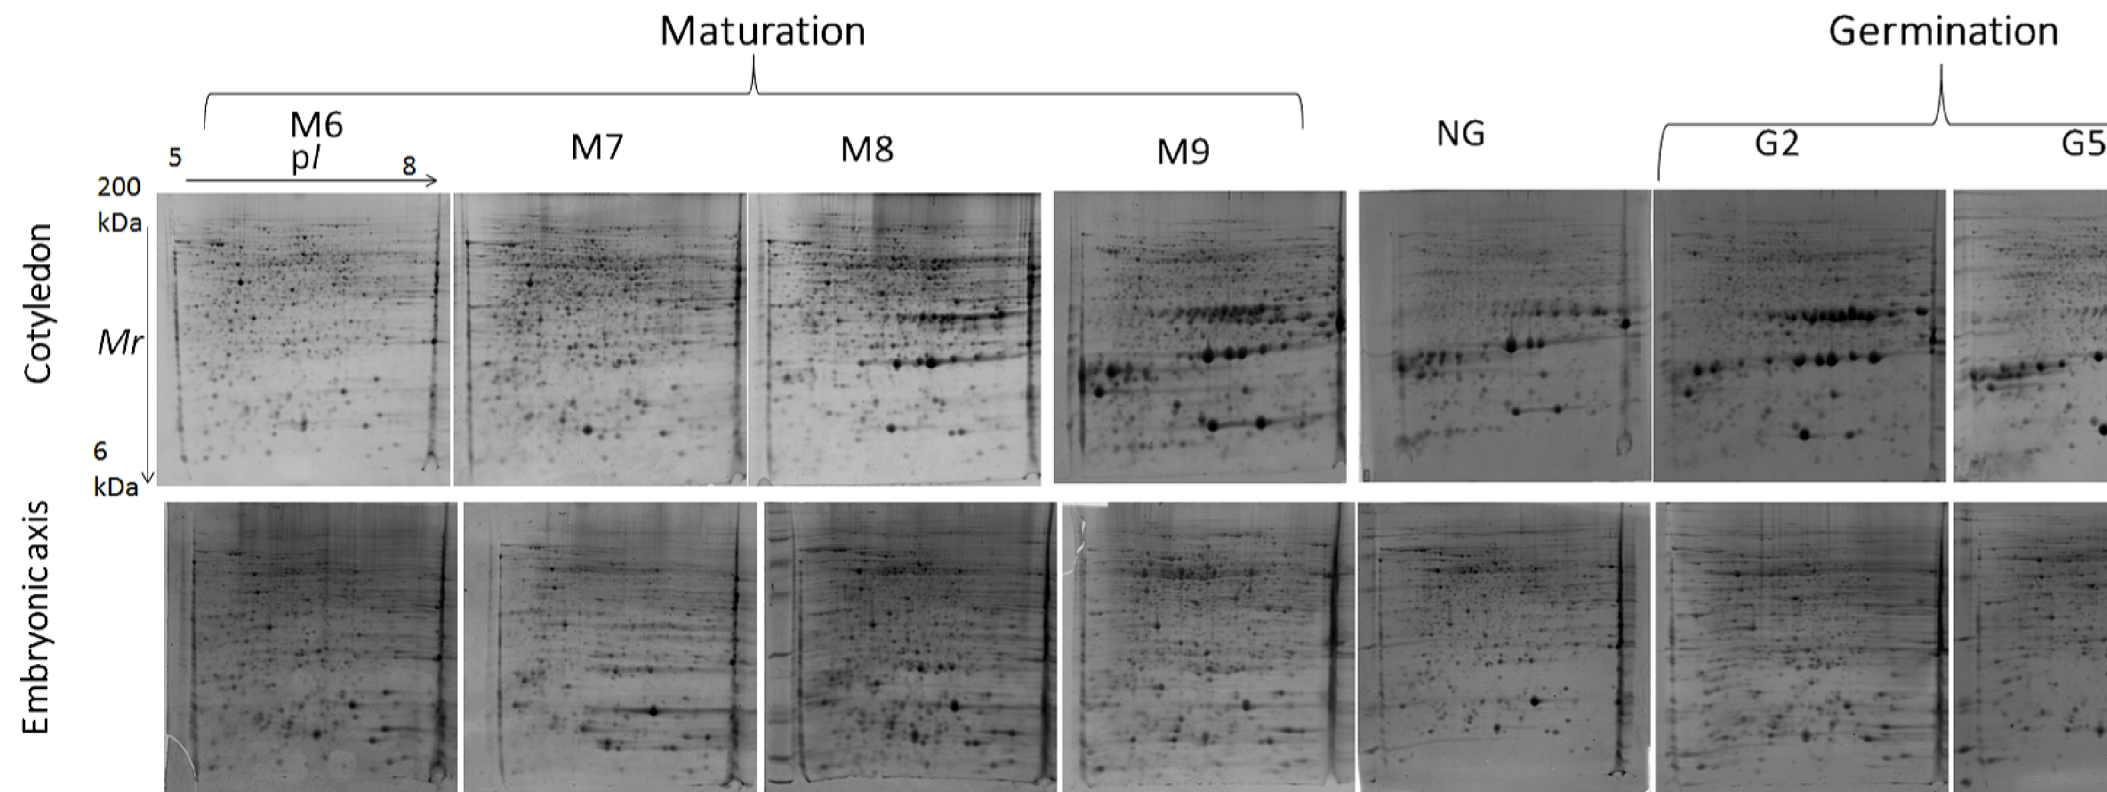

**Figure S5.** Tendencies in protein spots evolution along the maturation and germination stages, as determined by PCA analysis. (A) Cotyledons; (B) Embryo; (C) Maturation; (D) Germination

**A**

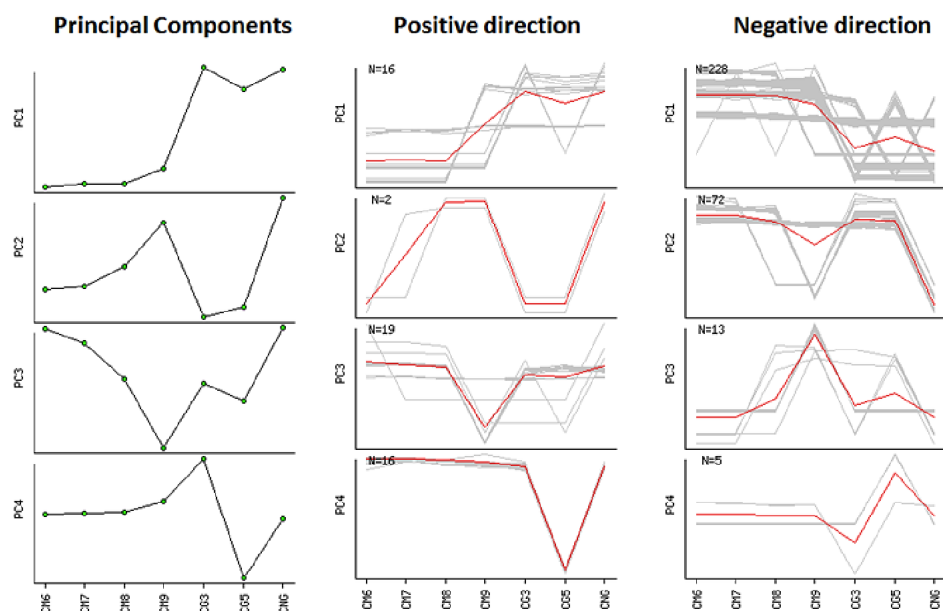

**B**

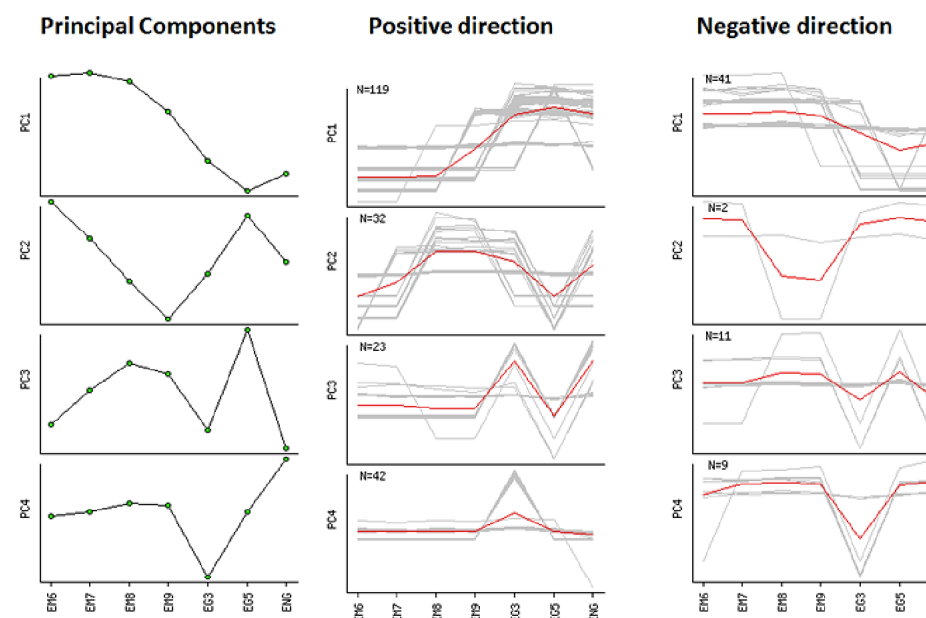

**C**

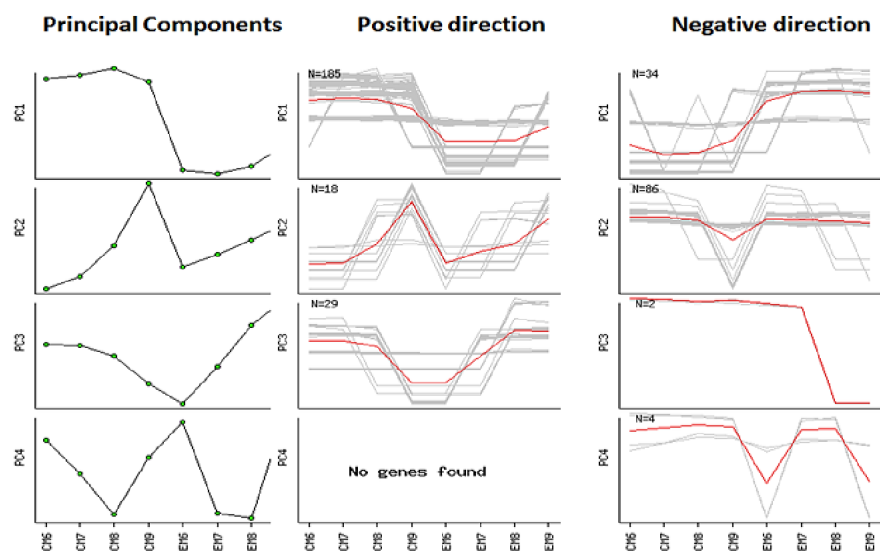

**D**

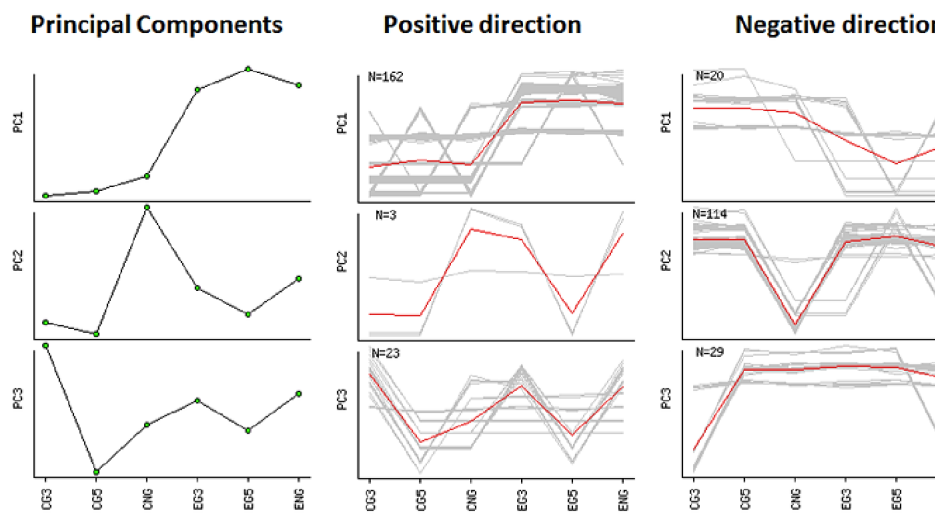

**Figure S6.** Dendrogram showing hierarchical clustering of different samples of cotyledon and embryonic during maturation (M6-M9) and germination (G3 and G5). The replicates (three) for each sample were numbered 1, 2 and 3. A short distance between samples and protein spots in the component space is indicative of similarity in expression profiles. Statistical protein expression cluster analysis of embryonic axis and cotyledon using the ANOVA-based NIA array analysis tool, p-value  $\leq 0.05$  (Sharov, Dudekula, & Ko, 2005).

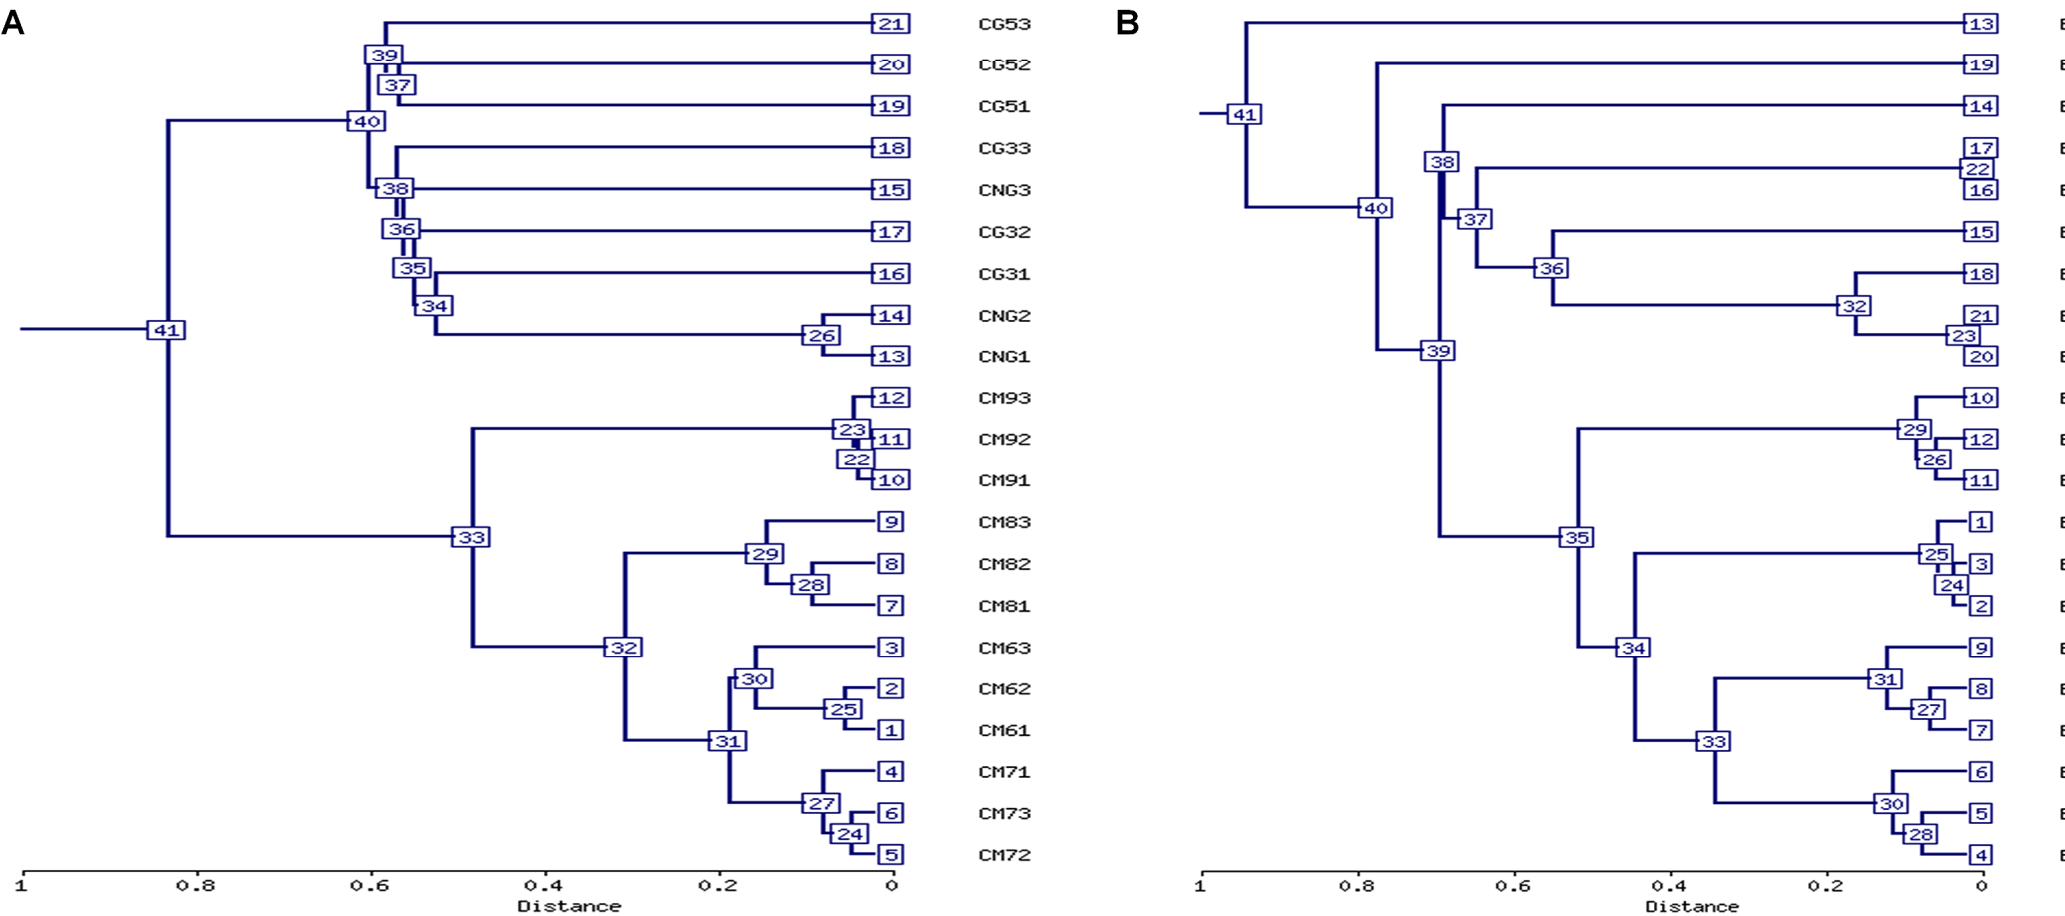

**Figure S7.** Photography of the acorns seeds placed on humid perlite (50 seeds/replicate, three replicates) in a plant growth chamber under 12/12 h photoperiod (25/20 °C) for germination.

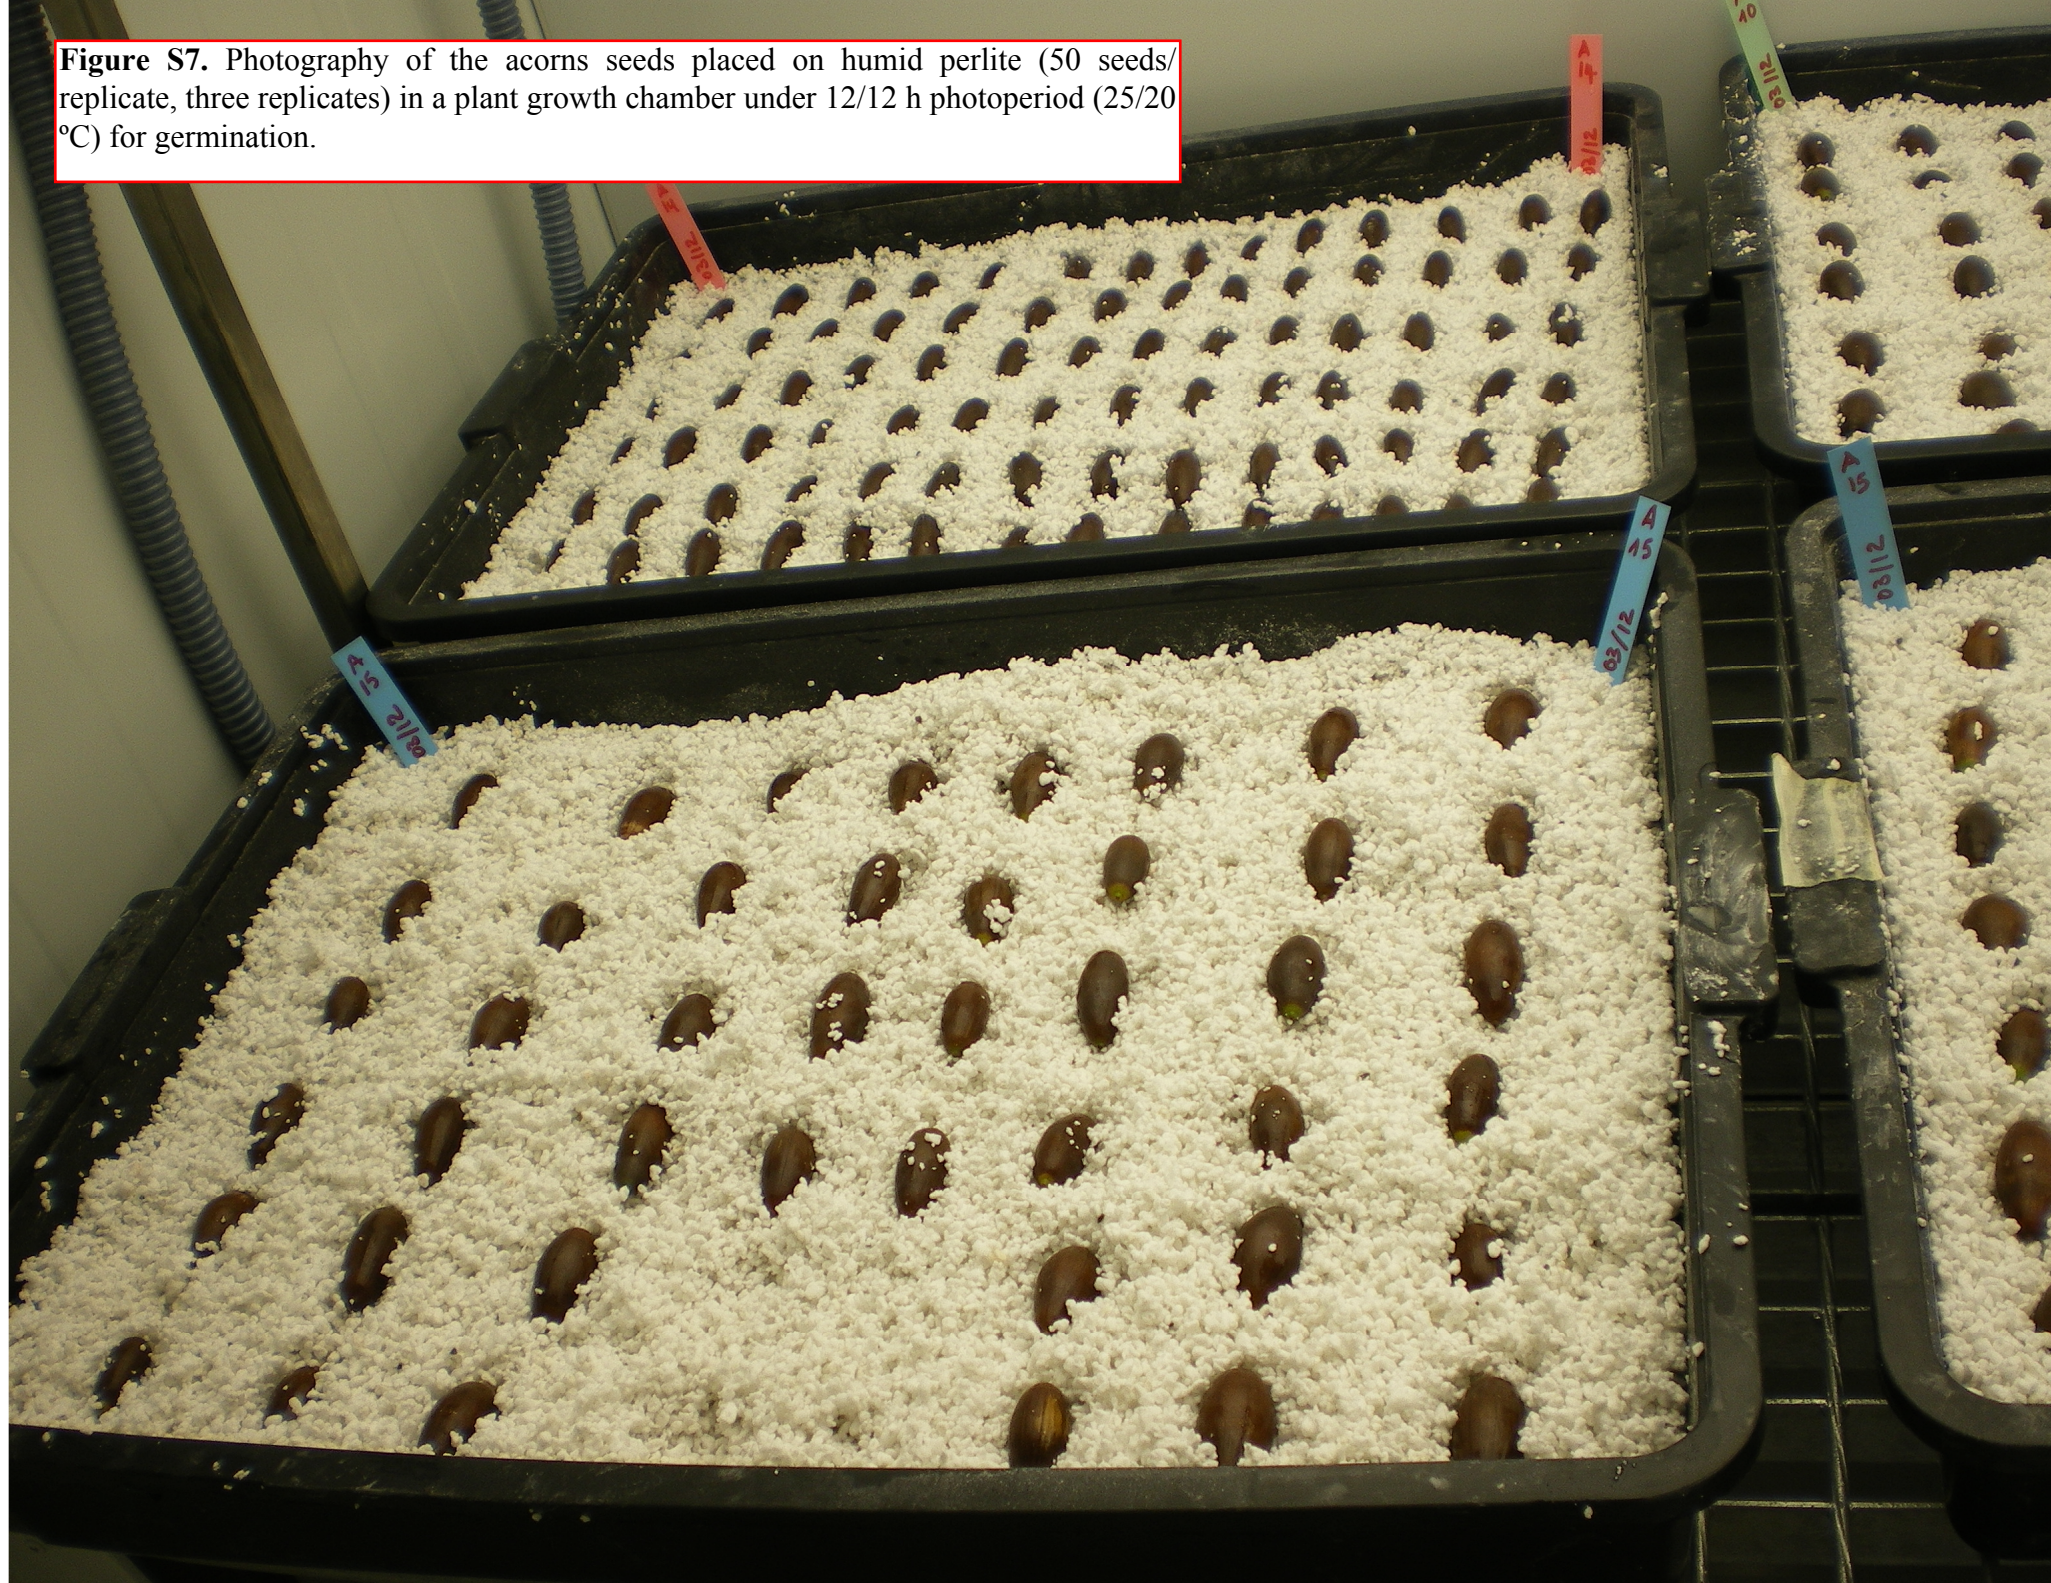

Supplement: s1 [file s1]
